# Supplementary material
Source: Springer Nature journal article supplement (https://www.springerprofessional.de/resource/supplementary/13638_2014_908_MOESM5_ESM.pdf/11899194)

Maximum Likelihood : Terminated at  $H_1$ 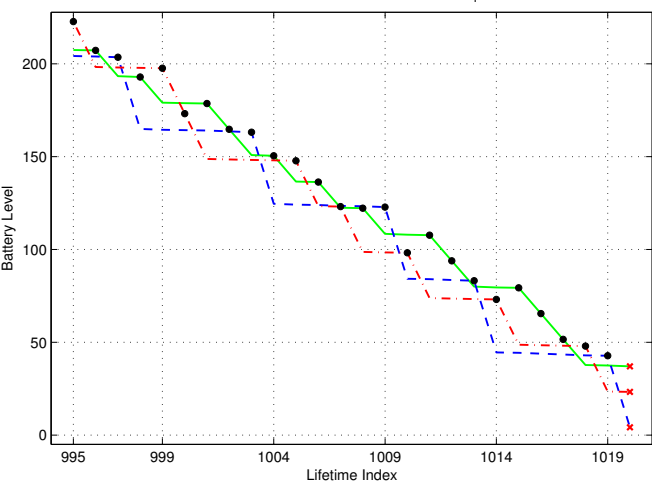Maximum Likelihood :  $H_3$ 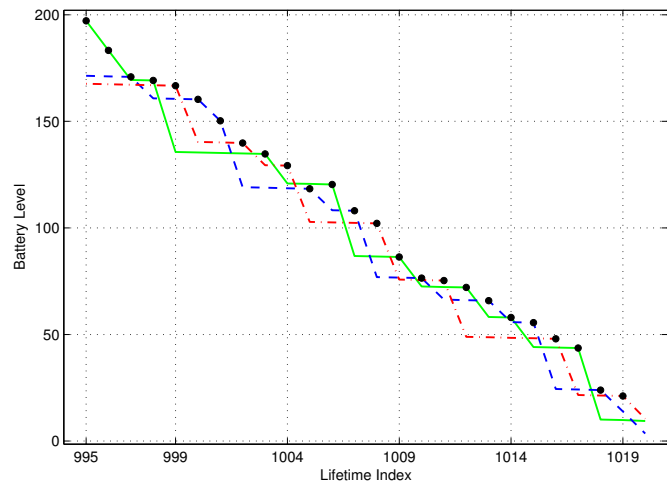Maximum :  $H_1$ 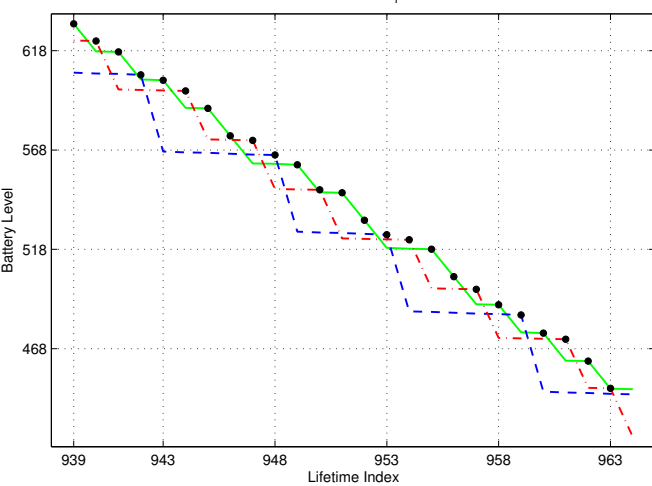Maximum : Terminated at  $H_3$ 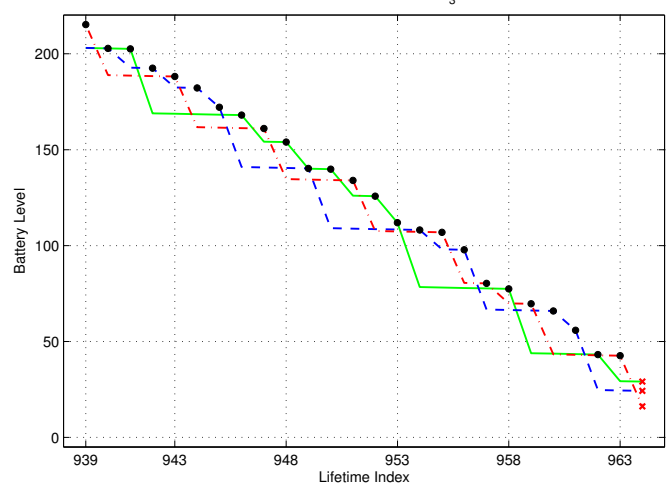Random : Terminated at  $H_1$ 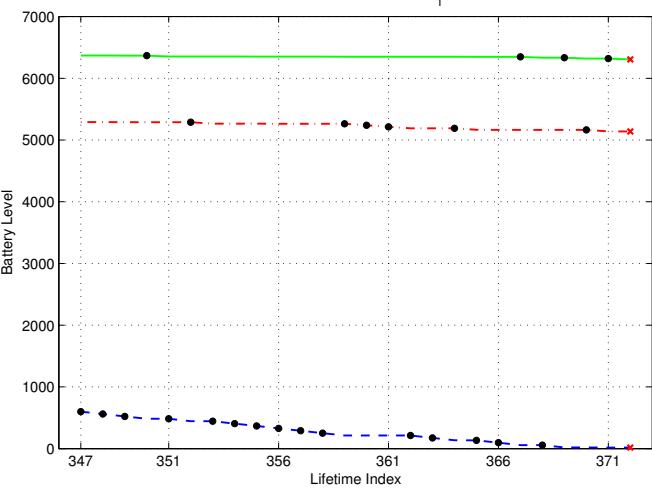Random :  $H_3$ 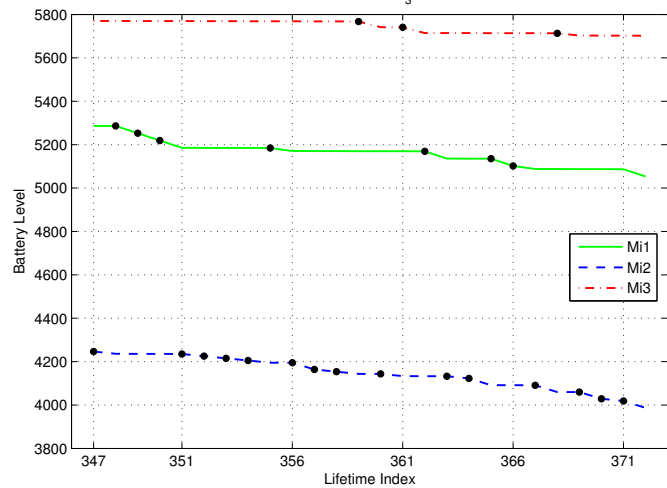

Supplement: MOESM5 [file 11899194]
